# Supplementary material for: Trends and Characteristics of Buprenorphine-Involved Overdose Deaths Prior to and During the COVID-19 Pandemic
Source: PubMed Central journal article supplement (PMC9860517; doi:10.1001/jamanetworkopen.2022.51856), 2023-01-20
Supplement: jamanetwopen-e2251856-s001.pdf [file jamanetwopen-e2251856-s001.pdf]

## Supplemental Online Content

Tanz LJ, Jones CM, Davis NL, et al. Trends and characteristics of buprenorphine-involved overdose deaths prior to and during the COVID-19 pandemic. *JAMA Netw Open*. 2023;6(1):e2251856. doi:10.1001/jamanetworkopen.2022.51856

**eTable 1.** Jurisdictions Included in Each Analysis

**eTable 2.** Number of Buprenorphine and Other Opioid–Involved Overdose Deaths and Percentage of Opioid Overdose Deaths Involving Buprenorphine by Month of Death in 32 Jurisdictions From July 2019 to June 2021

This supplemental material has been provided by the authors to give readers additional information about their work.

**eTable 1. Jurisdictions Included in Each Analysis**

| Jurisdiction         | Trends<br>(Figure 1) <sup>a</sup> | Drug co-involvement,<br>demographics, and<br>urbanicity (Table 1) <sup>b</sup> | Overdose<br>circumstances<br>(Table 2) <sup>c</sup> |
|----------------------|-----------------------------------|--------------------------------------------------------------------------------|-----------------------------------------------------|
|                      | N=32                              | N=47                                                                           | N=42                                                |
| Alabama              |                                   | X                                                                              |                                                     |
| Alaska               | X                                 | X                                                                              | X                                                   |
| Arizona              | X                                 | X                                                                              | X                                                   |
| Arkansas             |                                   | X                                                                              | X                                                   |
| Colorado             | X                                 | X                                                                              | X                                                   |
| Connecticut          | X                                 | X                                                                              | X                                                   |
| Delaware             | X                                 | X                                                                              | X                                                   |
| District of Columbia | X                                 | X                                                                              | X                                                   |
| Florida              |                                   | X                                                                              |                                                     |
| Georgia              | X                                 | X                                                                              | X                                                   |
| Hawaii               |                                   | X                                                                              | X                                                   |
| Idaho                |                                   | X                                                                              |                                                     |
| Illinois             | X                                 | X                                                                              | X                                                   |
| Indiana              |                                   | X                                                                              | X                                                   |
| Iowa                 |                                   | X                                                                              | X                                                   |
| Kansas               | X                                 | X                                                                              | X                                                   |
| Kentucky             | X                                 | X                                                                              | X                                                   |
| Louisiana            |                                   | X                                                                              | X                                                   |
| Maine                | X                                 | X                                                                              | X                                                   |
| Maryland             |                                   | X                                                                              | X                                                   |
| Massachusetts        | X                                 | X                                                                              | X                                                   |
| Michigan             |                                   | X                                                                              | X                                                   |
| Minnesota            | X                                 | X                                                                              | X                                                   |
| Mississippi          |                                   | X                                                                              | X                                                   |
| Missouri             | X                                 | X                                                                              | X                                                   |
| Montana              | X                                 | X                                                                              | X                                                   |
| Nebraska             |                                   | X                                                                              | X                                                   |
| Nevada               | X                                 | X                                                                              | X                                                   |
| New Hampshire        | X                                 | X                                                                              | X                                                   |
| New Jersey           | X                                 | X                                                                              | X                                                   |
| New Mexico           | X                                 | X                                                                              | X                                                   |
| New York             |                                   | X                                                                              |                                                     |
| North Carolina       | X                                 | X                                                                              | X                                                   |
| Ohio                 | X                                 | X                                                                              | X                                                   |
| Oklahoma             | X                                 | X                                                                              | X                                                   |
| Oregon               | X                                 | X                                                                              | X                                                   |
| Pennsylvania         | X                                 | X                                                                              | X                                                   |
| Rhode Island         | X                                 | X                                                                              | X                                                   |
| South Carolina       |                                   | X                                                                              |                                                     |
| South Dakota         | X                                 | X                                                                              | X                                                   |
| Tennessee            | X                                 | X                                                                              | X                                                   |
| Utah                 | X                                 | X                                                                              | X                                                   |

|                                                                                                                                                                                                                                                                                                                                                                       |   |   |   |
|-----------------------------------------------------------------------------------------------------------------------------------------------------------------------------------------------------------------------------------------------------------------------------------------------------------------------------------------------------------------------|---|---|---|
| Vermont                                                                                                                                                                                                                                                                                                                                                               | X | X | X |
| Virginia                                                                                                                                                                                                                                                                                                                                                              | X | X | X |
| Washington                                                                                                                                                                                                                                                                                                                                                            | X | X | X |
| West Virginia                                                                                                                                                                                                                                                                                                                                                         | X | X | X |
| Wisconsin                                                                                                                                                                                                                                                                                                                                                             |   | X | X |
| "X" denotes inclusion in the specified analysis                                                                                                                                                                                                                                                                                                                       |   |   |   |
| <sup>a</sup> Includes jurisdictions that reported unintentional and undetermined intent drug overdose deaths from counties representing $\geq 75\%$ of overdose deaths for every 6-month period from July 2019–June 2021 (i.e., July–December 2019, January–June 2020, July–December 2020, and January–June 2021).                                                    |   |   |   |
| <sup>b</sup> Includes jurisdictions with death certificate data available from counties representing $\geq 75\%$ of overdose deaths for at least one six-month period during July 2019–June 2021 (i.e., July–December 2019, January–June 2020, July–December 2020, or January–June 2021).                                                                             |   |   |   |
| <sup>c</sup> Includes jurisdictions with death certificate data available from counties representing $\geq 75\%$ of overdose deaths and medical examiner or coroner reports available for $\geq 75\%$ of deaths for at least one six-month period during July 2019–June 2021 (i.e., July–December 2019, January–June 2020, July–December 2020, or January–June 2021). |   |   |   |

**eTable 2. Number of Buprenorphine and Other Opioid–Involved Overdose Deaths<sup>a</sup> and Percentage of Opioid Overdose Deaths Involving Buprenorphine by Month of Death<sup>b</sup> in 32 Jurisdictions<sup>c</sup> From July 2019 to June 2021**

|                | Buprenorphine-involved overdose deaths | Other opioid-involved overdose deaths <sup>a</sup> | All opioid involved overdose deaths <sup>d</sup> | Percent of opioid overdose deaths involving buprenorphine <sup>e</sup> |
|----------------|----------------------------------------|----------------------------------------------------|--------------------------------------------------|------------------------------------------------------------------------|
|                | N                                      | N                                                  | N                                                | %                                                                      |
| July 2019      | 86                                     | 2,322                                              | 2,408                                            | 3.6                                                                    |
| August 2019    | 57                                     | 2,411                                              | 2,468                                            | 2.3                                                                    |
| September 2019 | 65                                     | 2,294                                              | 2,359                                            | 2.8                                                                    |
| October 2019   | 67                                     | 2,410                                              | 2,477                                            | 2.7                                                                    |
| November 2019  | 72                                     | 2,448                                              | 2,520                                            | 2.9                                                                    |
| December 2019  | 66                                     | 2,637                                              | 2,703                                            | 2.4                                                                    |
| January 2020   | 84                                     | 2,549                                              | 2,633                                            | 3.2                                                                    |
| February 2020  | 78                                     | 2,481                                              | 2,559                                            | 3.0                                                                    |
| March 2020     | 59                                     | 2,817                                              | 2,876                                            | 2.1                                                                    |
| April 2020     | 93                                     | 3,268                                              | 3,361                                            | 2.8                                                                    |
| May 2020       | 98                                     | 4,019                                              | 4,117                                            | 2.4                                                                    |
| June 2020      | 91                                     | 3,328                                              | 3,419                                            | 2.7                                                                    |
| July 2020      | 83                                     | 3,394                                              | 3,477                                            | 2.4                                                                    |
| August 2020    | 83                                     | 3,155                                              | 3,238                                            | 2.6                                                                    |
| September 2020 | 79                                     | 2,936                                              | 3,015                                            | 2.6                                                                    |
| October 2020   | 74                                     | 2,887                                              | 2,961                                            | 2.5                                                                    |
| November 2020  | 85                                     | 2,969                                              | 3,054                                            | 2.8                                                                    |
| December 2020  | 80                                     | 2,969                                              | 3,049                                            | 2.6                                                                    |
| January 2021   | 105                                    | 3,440                                              | 3,545                                            | 3.0                                                                    |
| February 2021  | 83                                     | 3,048                                              | 3,131                                            | 2.7                                                                    |
| March 2021     | 108                                    | 3,788                                              | 3,896                                            | 2.8                                                                    |
| April 2021     | 97                                     | 3,735                                              | 3,832                                            | 2.5                                                                    |
| May 2021       | 87                                     | 3,741                                              | 3,828                                            | 2.3                                                                    |
| June 2021      | 75                                     | 3,473                                              | 3,548                                            | 2.1                                                                    |

<sup>a</sup>Includes opioid-involved overdose deaths that do not involve buprenorphine. Thus, the buprenorphine-involved and other opioid-involved categories are mutually exclusive and together make up all opioid-involved overdose deaths.

<sup>b</sup>Based on date of death. If date of death was missing, date pronounced dead was used.

<sup>c</sup>Includes Alaska, Arizona, Colorado, Connecticut, Delaware, District of Columbia, Georgia, Illinois, Kansas, Kentucky, Maine, Massachusetts, Minnesota, Missouri, Montana, Nevada, New Hampshire, New Jersey, New Mexico, North Carolina, Ohio, Oklahoma, Oregon, Pennsylvania, Rhode Island, South Dakota, Tennessee, Utah, Vermont, Virginia, Washington, and West Virginia. Illinois, Missouri, and Washington reported deaths from counties that accounted for ≥75% of drug overdose deaths in the state in 2017, per the State Unintentional Drug Overdose Reporting System funding requirements; all other jurisdictions reported deaths from the full jurisdiction.

<sup>d</sup>Represents the sum of buprenorphine-involved overdose deaths and other opioid-involved overdose deaths.

<sup>e</sup>Calculated by dividing the number of buprenorphine-involved overdose deaths by all opioid overdose deaths.
