# Supplementary material for: Trends and Characteristics of Buprenorphine-Involved Overdose Deaths Prior to and During the COVID-19 Pandemic
Source: PubMed Central journal article supplement (PMC9860517; doi:10.1001/jamanetworkopen.2022.51856), 2023-01-20
Supplement: jamanetwopen-e2251856-s002.pdf [file jamanetwopen-e2251856-s002.pdf]

## Data Sharing Statement

Tanz. Trends and Characteristics of Buprenorphine-Involved Overdose Deaths Prior to and During the COVID-19 Pandemic. *JAMA Netw Open*. Published January 20, 2023.

doi:10.1001/jamanetworkopen.2022.51856

### Data

**Data available:** No

### Additional Information

**Explanation for why data not available:** The data underlying this article may not be shared due to data sharing agreements in place with state health departments.
